# Supplementary material for: An efficient and novel technology for the extraction of parasite genomic DNA from whole blood or culture
Source: PubMed Central journal article supplement — Biotechniques. 2019 Nov 27;68(2):79–84. doi: 10.2144/btn-2019-0086 (PMC7115988; doi:10.2144/btn-2019-0086), 2019-11-27
Supplement: EMS88673-supplement-Supplementary_data_1.pdf [file EMS88673-supplement-Supplementary_data_1.pdf]

| Experiment 1 | Parasitaemia, % |         |         |        |
|--------------|-----------------|---------|---------|--------|
|              | Predicted       | Count 1 | Count 2 | Actual |
|              | 1               | 1.16    | 1.44    | 1.30   |
|              | 0.1             | 0.10    | 0.09496 | 0.10   |
|              | 0.01            | NT      | NT      | NT     |
|              | 0               | NA      | NA      | NA     |

| Experiment 2 | Parasitaemia, % |         |         |        |
|--------------|-----------------|---------|---------|--------|
|              | Predicted       | Count 1 | Count 2 | Actual |
|              | 1               | 0.88    | 0.79    | 0.84   |
|              | 0.1             | 0.09    | 0.09    | 0.09   |
|              | 0.01            | NT      | NT      | 0.01   |
|              | 0               | NA      | NA      | NA     |

| Experiment 3 | Parasitaemia, % |         |         |        |
|--------------|-----------------|---------|---------|--------|
|              | Predicted       | Count 1 | Count 2 | Actual |
|              | 1               | 0.91    | 0.95    | 0.93   |
|              | 0.1             | 0.10    | 0.10    | 0.10   |
|              | 0.01            | NT      | NT      | NT     |
|              | 0               | NA      | NA      | NA     |

NT: Not tested

NA: Not applicable
