# Supplementary material for: An efficient and novel technology for the extraction of parasite genomic DNA from whole blood or culture
Source: PubMed Central journal article supplement — Biotechniques. 2019 Nov 27;68(2):79–84. doi: 10.2144/btn-2019-0086 (PMC7115988; doi:10.2144/btn-2019-0086), 2019-11-27
Supplement: EMS88673-supplement-Supplementary_Fig_1_and_Fig_2.pdf [file EMS88673-supplement-Supplementary_Fig_1_and_Fig_2.pdf]

## Additional file 2

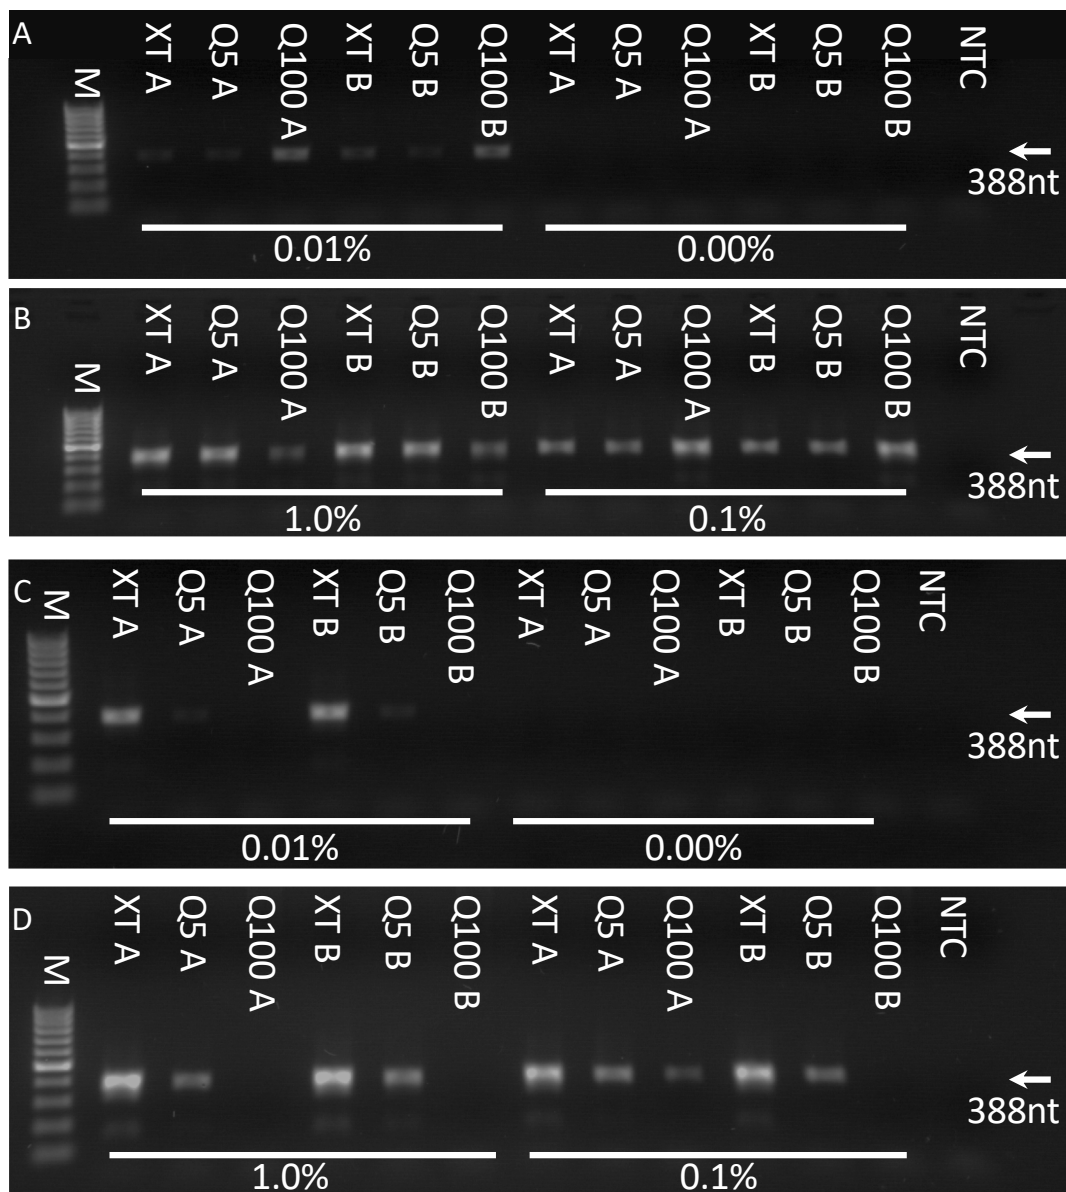

## Additional file 2

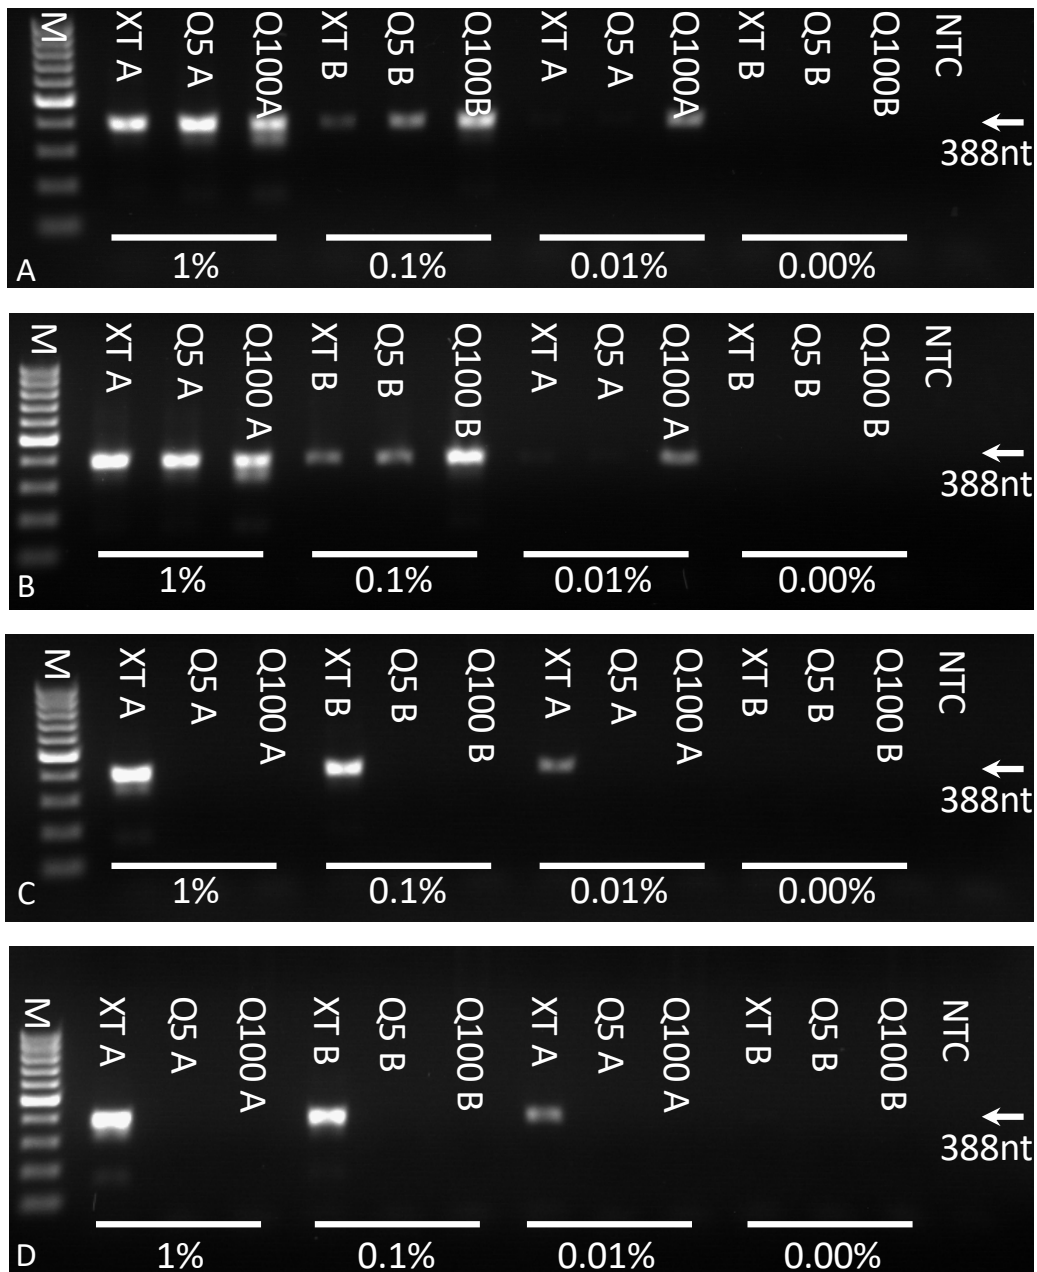

Supplementary Figure 2: *Plasmodium falciparum* DNA from spiked whole blood determined by *PfBeta* tubulin PCR. A and B. low volume eluate template, 1 µl C and D. high volume eluate template, 10 µl. Two extractions run per parasitaemia condition. M: 100bp marker, NTC: No template control. Percentage denotes the parasitaemia post spiking.
